# Supplementary material for: The impact of side-chain fluorination on proton-bound phenylalanine dimers: a cryogenic infrared spectroscopic study
Source: Royal Society of Chemistry journal article supplement (doi:10.1039/d4cp03823a), 2024-01-01
Supplement: d4cp03823a1.pdf [file d4cp03823a1.pdf]

## Supporting Information

### The Impact of Side-Chain Fluorination on Proton-Bound Phenylalanine Dimers: A Cryogenic Infrared Spectroscopic Study

Marc Safferthal,<sup>†ab</sup> Kim Greis,<sup>†abc</sup> Rayoon Chang,<sup>†ab</sup> Chun-Wei Chang,<sup>ab</sup> Waldemar Hoffmann,<sup>ab</sup> Gerard Meijer,<sup>b</sup> Gert von Helden<sup>b</sup> and Kevin Pagel<sup>\*ab</sup>

a Department of Biology, Chemistry, Pharmacy, Freie Universität Berlin, Altensteinstraße 23a, 14195 Berlin, Germany.

b Fritz Haber Institute of the Max Planck Society, Faradayweg 4-6, 14195 Berlin, Germany.

c Department of Chemistry and Applied Biosciences, ETH Zürich, Vladimir-Prelog-Weg 10, 8093, Zürich, Switzerland.

\* Corresponding author. E-mail: [kevin.pagel@fu-berlin.de](mailto:kevin.pagel@fu-berlin.de)

† These authors contributed equally to this work.

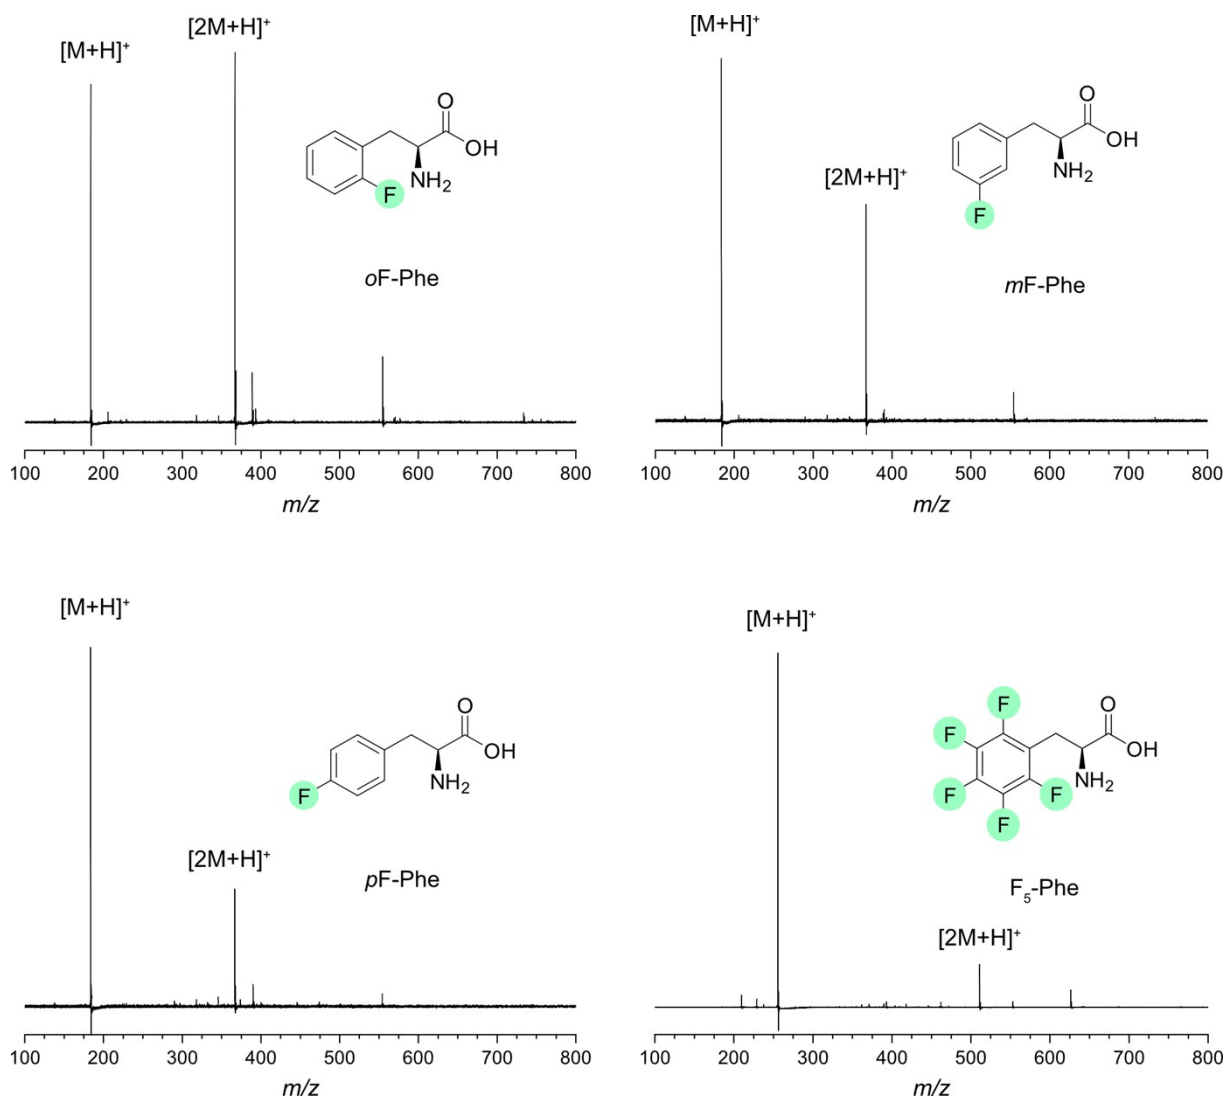

Fig. S1: Mass spectra of *ortho*- (oF-Phe), *meta*- (mF-Phe), *para*- (pF-Phe) and pentafluorophenylalanine (F<sub>5</sub>-Phe) recorded on the helium droplet instrument. The proton-bound dimers  $[2M+H]^+$  of the monofluorinated ( $m/z$  367) and pentafluorinated phenylalanines ( $m/z$  511) are generated by nESI.

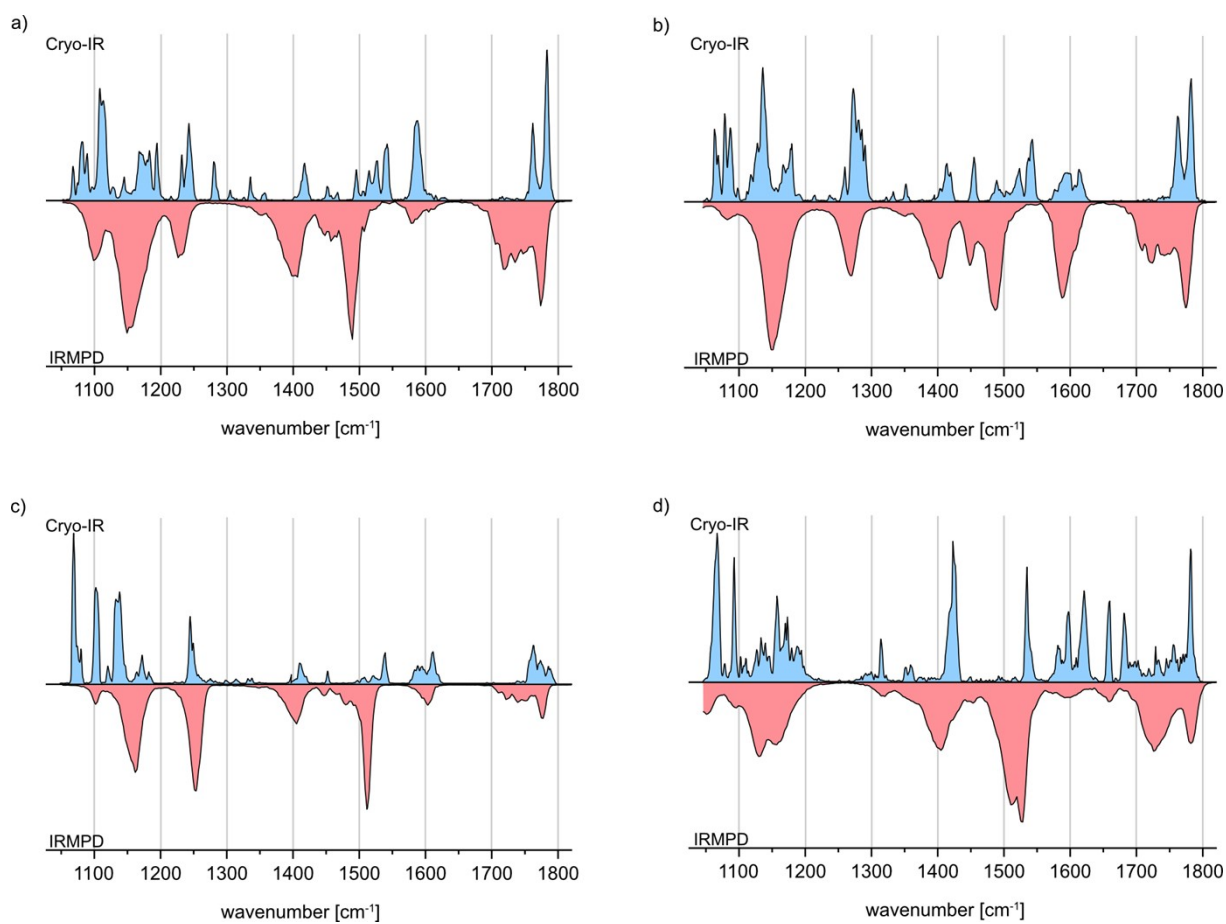

Fig. S2: Comparison of experimental IRMPD and cryogenic IR spectra of a)  $(oF\text{-Phe})_2\text{H}^+$ , b)  $(mF\text{-Phe})_2\text{H}^+$ , c)  $(pF\text{-Phe})_2\text{H}^+$ , and d)  $(F_5\text{-Phe})_2\text{H}^+$ .

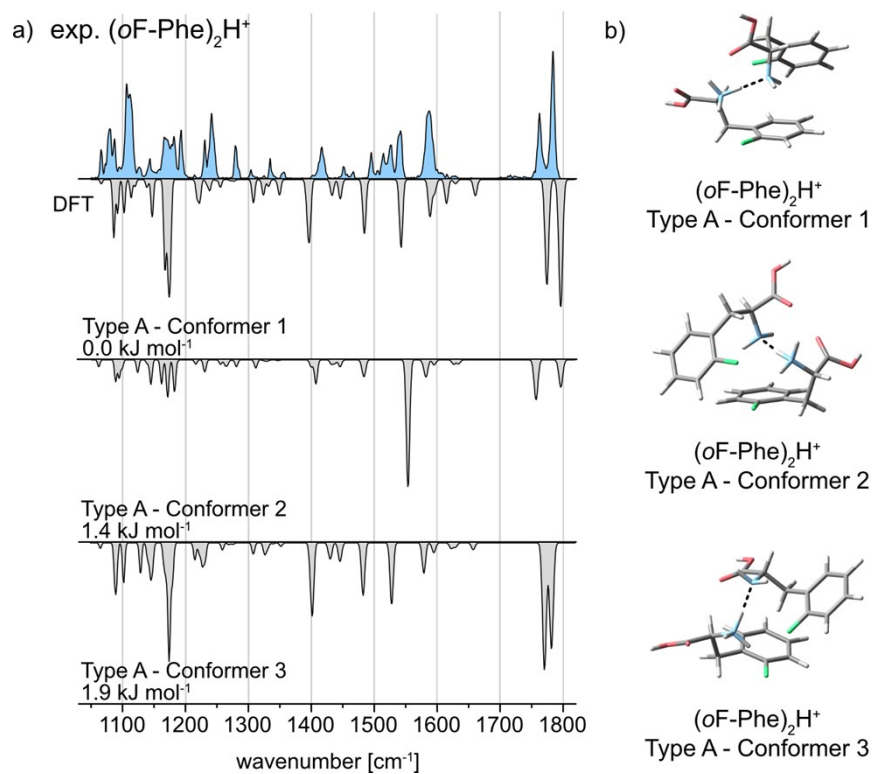

Fig. S3: a) Infrared spectra of the proton-bound homodimer of *ortho*-fluorophenylalanine. Experimental IR spectra are depicted as light blue traces. Computed spectra of the low-energy conformers are shown as gray inverted traces. Relative free energies at 90 K are indicated. b) Low-energy structures of the A type interaction for  $(oF-Phe)_2H^+$ .

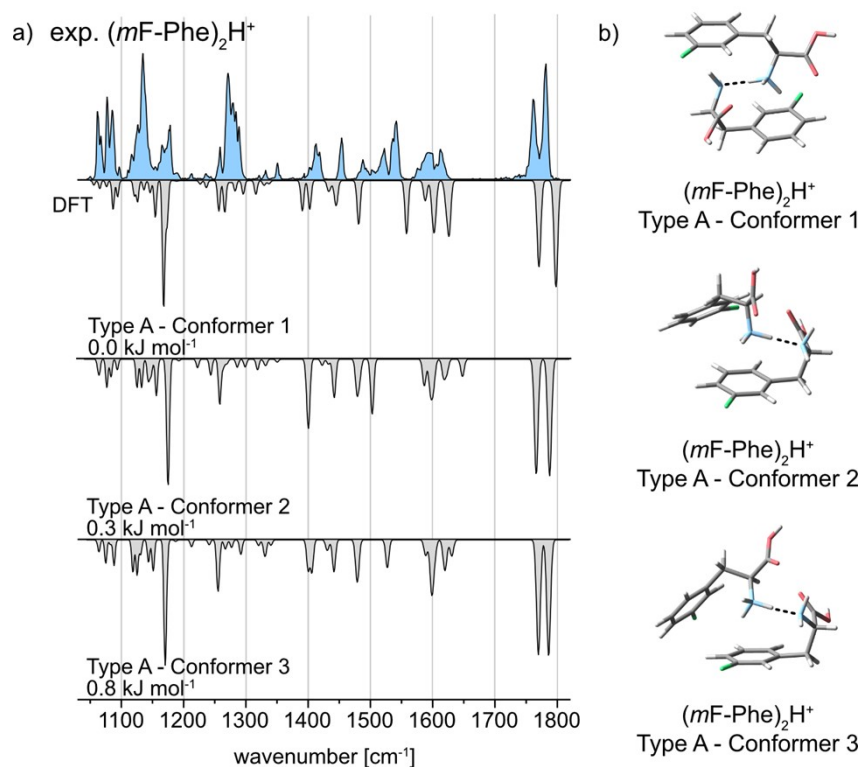

Fig. S4: a) Infrared spectra of the proton-bound homodimer of *meta*-fluorophenylalanine. Experimental IR spectra are depicted as light blue traces. Computed spectra of the low-energy conformers are shown as gray inverted traces. Relative free energies at 90 K are indicated. b) Low-energy structures of the A type interaction for  $(mF-Phe)_2H^+$ .

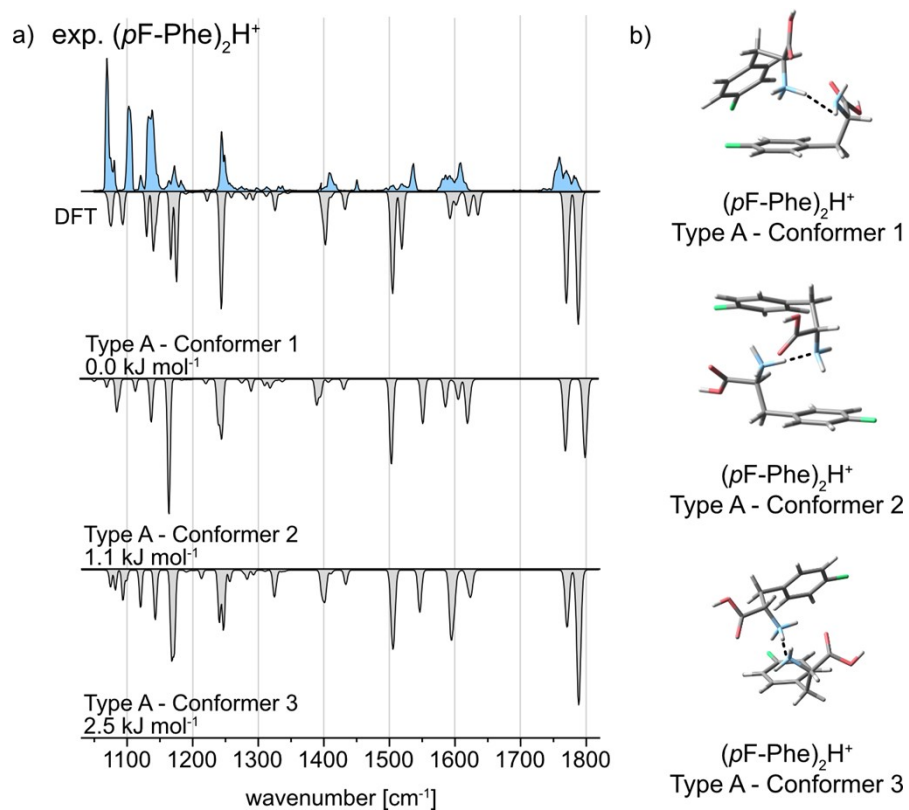

Fig. S5: a) Infrared spectra of the proton-bound homodimer of *para*-fluorophenylalanine. Experimental IR spectra are depicted as light blue traces. Computed spectra of the low-energy conformers are shown as gray inverted traces. Relative free energies at 90 K are indicated. b) Low-energy structures of the A type interaction for  $(pF-Phe)_2H^+$ .

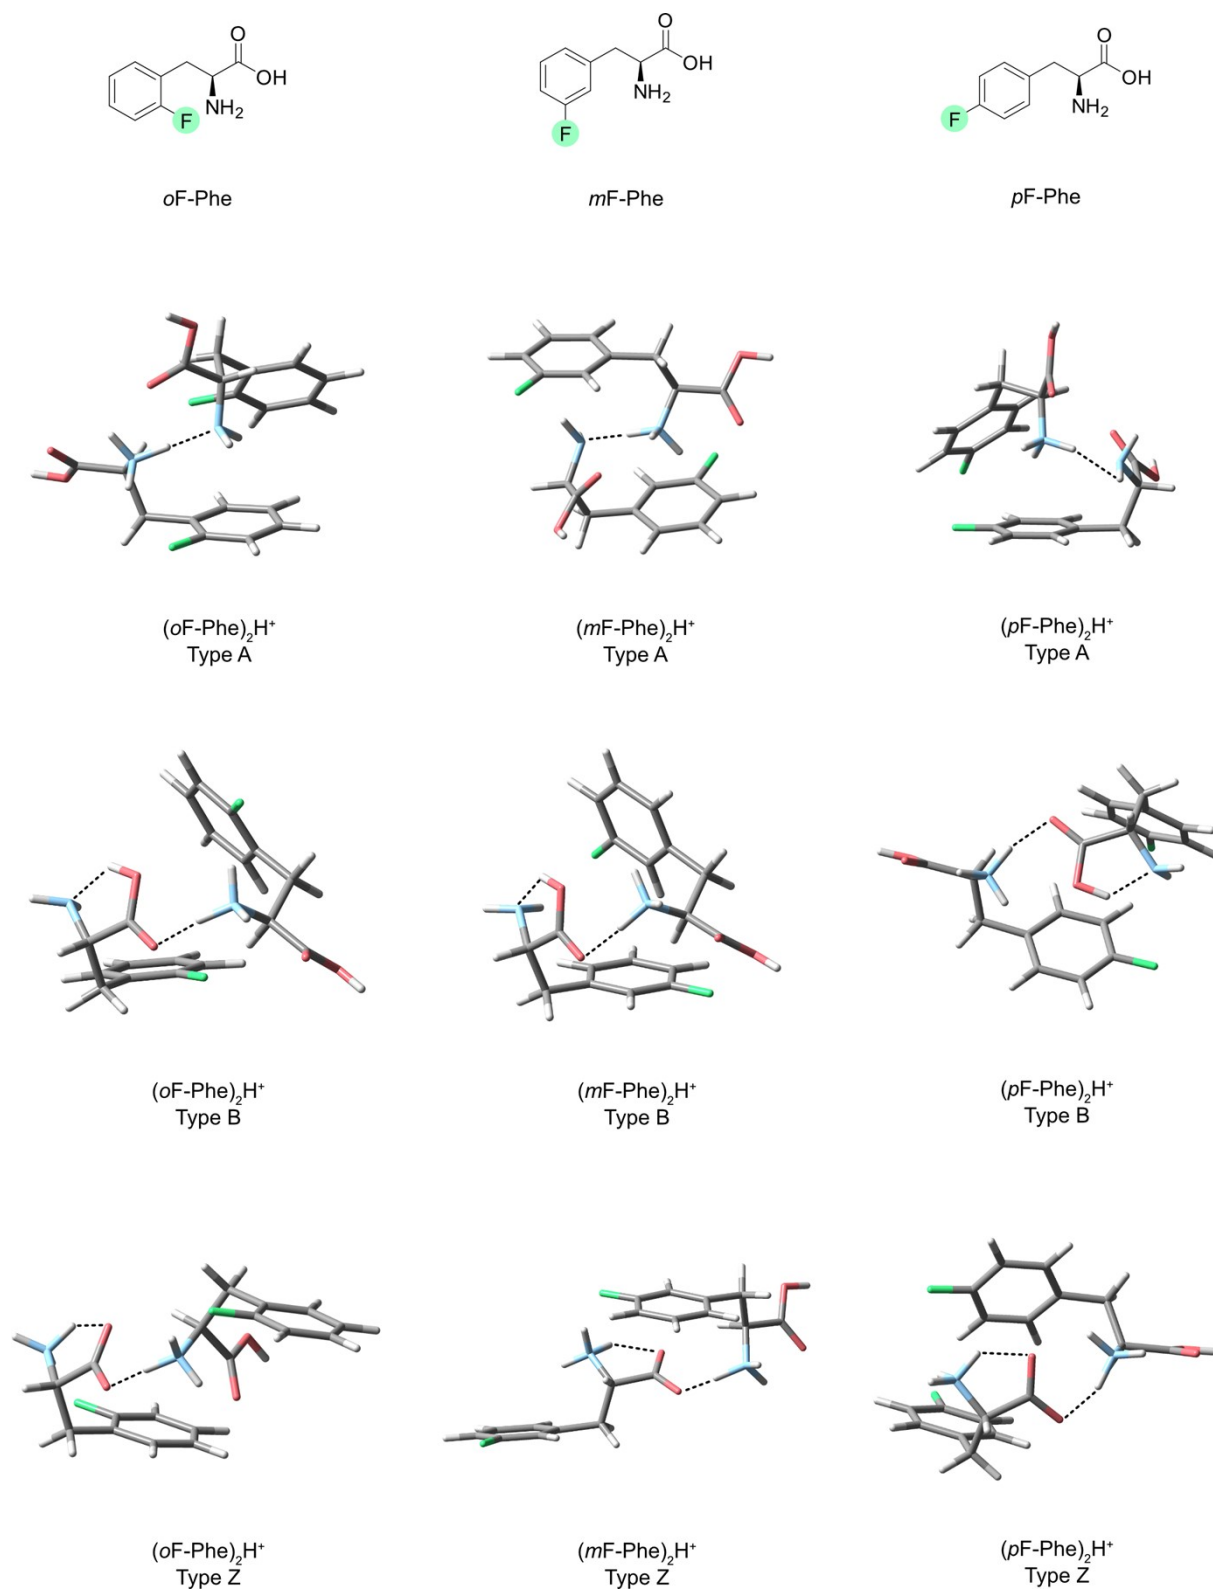

Fig. S6: Computed lowest-energy structures of the proton-bound monofluorinated dimers.

Table S1: Relative zero-point corrected total energies ( $\Delta E$ ) and free energies ( $\Delta F$ ) of selected

| derivative                                        | type | conformer | $\Delta E$                | $\Delta F$                |
|---------------------------------------------------|------|-----------|---------------------------|---------------------------|
| ( <i>o</i> F-Phe) <sub>2</sub> H <sup>+</sup>     | A    | 1         | 0.0 kJ mol <sup>-1</sup>  | 0.0 kJ mol <sup>-1</sup>  |
| ( <i>o</i> F-Phe) <sub>2</sub> H <sup>+</sup>     | A    | 2         | 0.5 kJ mol <sup>-1</sup>  | 1.4 kJ mol <sup>-1</sup>  |
| ( <i>o</i> F-Phe) <sub>2</sub> H <sup>+</sup>     | A    | 3         | 1.3 kJ mol <sup>-1</sup>  | 1.9 kJ mol <sup>-1</sup>  |
| ( <i>o</i> F-Phe) <sub>2</sub> H <sup>+</sup>     | B    | 1         | 3.2 kJ mol <sup>-1</sup>  | 2.4 kJ mol <sup>-1</sup>  |
| ( <i>o</i> F-Phe) <sub>2</sub> H <sup>+</sup>     | Z    | 1         | 3.6 kJ mol <sup>-1</sup>  | 3.1 kJ mol <sup>-1</sup>  |
| ( <i>m</i> F-Phe) <sub>2</sub> H <sup>+</sup>     | A    | 1         | 0.3 kJ mol <sup>-1</sup>  | 0.0 kJ mol <sup>-1</sup>  |
| ( <i>m</i> F-Phe) <sub>2</sub> H <sup>+</sup>     | A    | 2         | 0.0 kJ mol <sup>-1</sup>  | 0.3 kJ mol <sup>-1</sup>  |
| ( <i>m</i> F-Phe) <sub>2</sub> H <sup>+</sup>     | A    | 3         | 0.2 kJ mol <sup>-1</sup>  | 0.8 kJ mol <sup>-1</sup>  |
| ( <i>m</i> F-Phe) <sub>2</sub> H <sup>+</sup>     | B    | 1         | 3.4 kJ mol <sup>-1</sup>  | 4.9 kJ mol <sup>-1</sup>  |
| ( <i>m</i> F-Phe) <sub>2</sub> H <sup>+</sup>     | Z    | 1         | 9.4 kJ mol <sup>-1</sup>  | 9.3 kJ mol <sup>-1</sup>  |
| ( <i>p</i> F-Phe) <sub>2</sub> H <sup>+</sup>     | A    | 1         | 0.0 kJ mol <sup>-1</sup>  | 0.0 kJ mol <sup>-1</sup>  |
| ( <i>p</i> F-Phe) <sub>2</sub> H <sup>+</sup>     | A    | 2         | 3.0 kJ mol <sup>-1</sup>  | 1.1 kJ mol <sup>-1</sup>  |
| ( <i>p</i> F-Phe) <sub>2</sub> H <sup>+</sup>     | A    | 3         | 4.3 kJ mol <sup>-1</sup>  | 2.5 kJ mol <sup>-1</sup>  |
| ( <i>p</i> F-Phe) <sub>2</sub> H <sup>+</sup>     | B    | 1         | 12.5 kJ mol <sup>-1</sup> | 13.4 kJ mol <sup>-1</sup> |
| ( <i>p</i> F-Phe) <sub>2</sub> H <sup>+</sup>     | Z    | 1         | 16.7 kJ mol <sup>-1</sup> | 18.2 kJ mol <sup>-1</sup> |
| (F <sub>5</sub> -Phe) <sub>2</sub> H <sup>+</sup> | A    | 1         | 0.0 kJ mol <sup>-1</sup>  | 0.0 kJ mol <sup>-1</sup>  |
| (F <sub>5</sub> -Phe) <sub>2</sub> H <sup>+</sup> | B    | 1         | 4.8 kJ mol <sup>-1</sup>  | 2.5 kJ mol <sup>-1</sup>  |
| (F <sub>5</sub> -Phe) <sub>2</sub> H <sup>+</sup> | Z    | 1         | 3.2 kJ mol <sup>-1</sup>  | 2.8 kJ mol <sup>-1</sup>  |

conformers.

### xyz-coordinates of reoptimized structures

xyz-Coordinates of all reoptimized geometries at the PBE0+D3BJ/6-311+G(d,p) level of theory can be found in a separate document "coordinates.xyz".



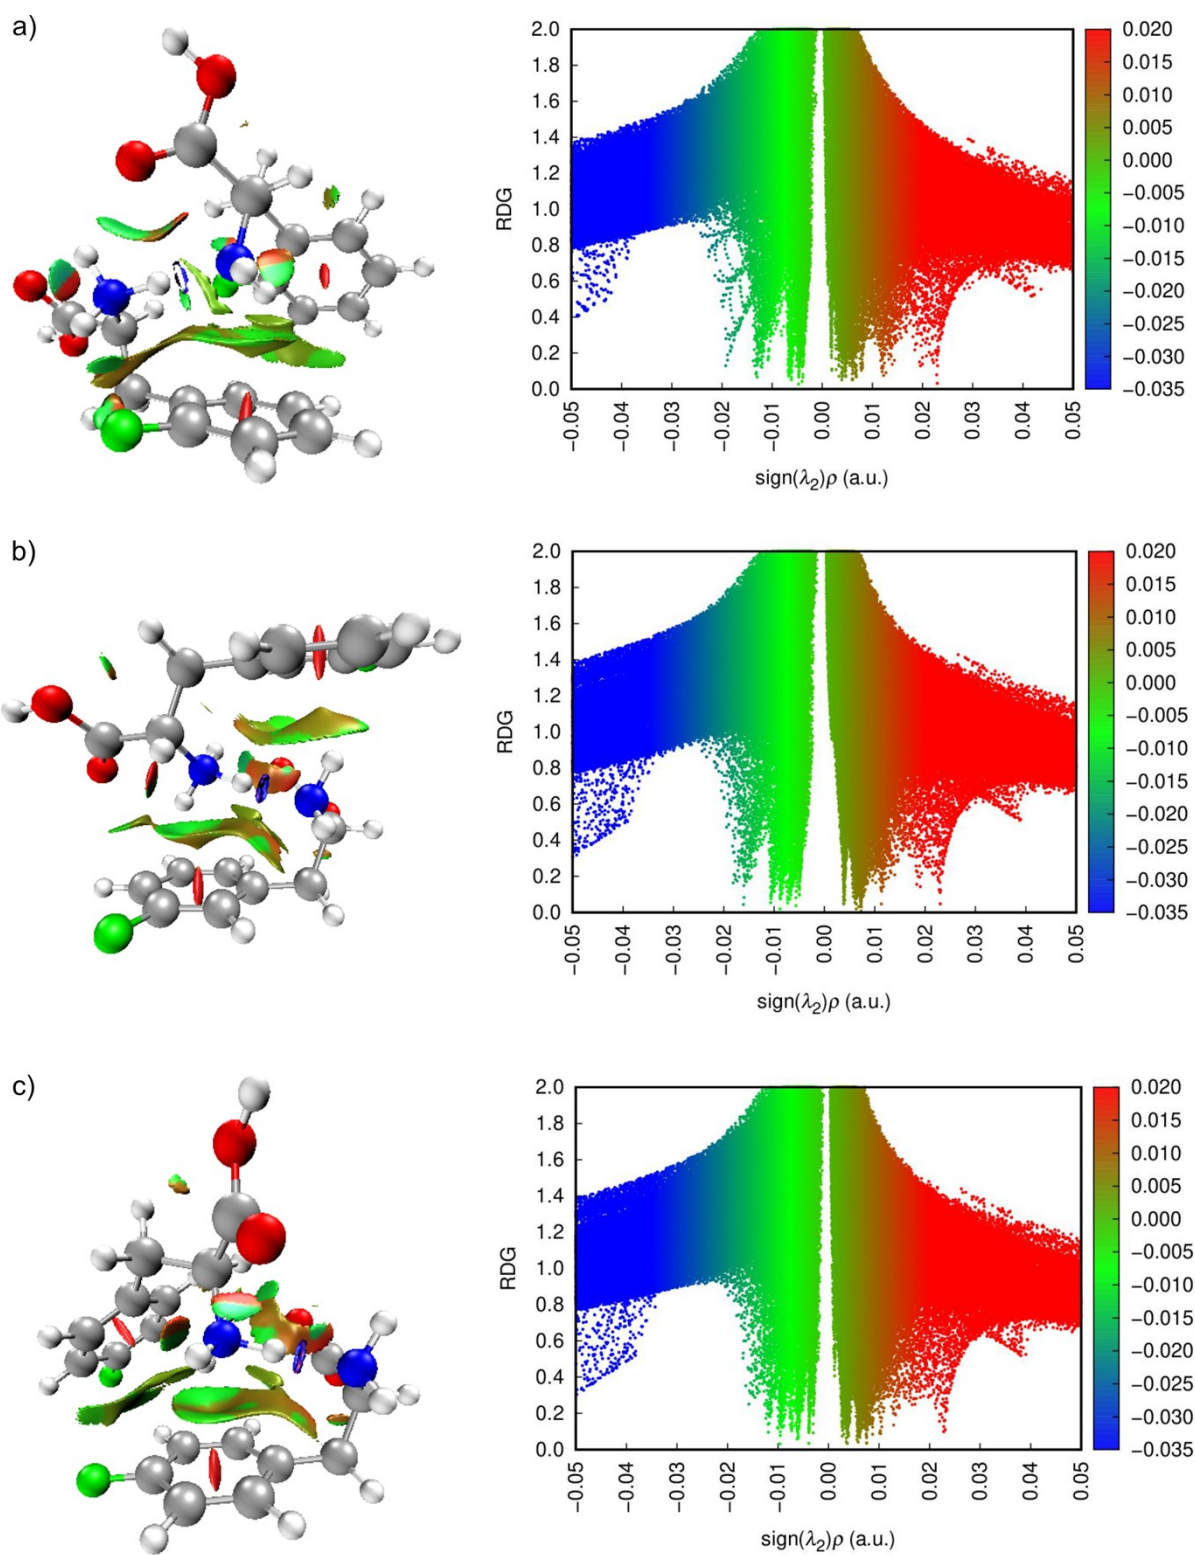

Fig. S7: Non-covalent interaction (NCI) analysis of lowest-energy type A conformers for monofluorinated phenylalanine dimers. Reduced density gradient isosurface map (left) and scatter plot (right) for a)  $(oF\text{-Phe})_2\text{H}^+$ , b)  $(mF\text{-Phe})_2\text{H}^+$ , and c)  $(pF\text{-Phe})_2\text{H}^+$ .

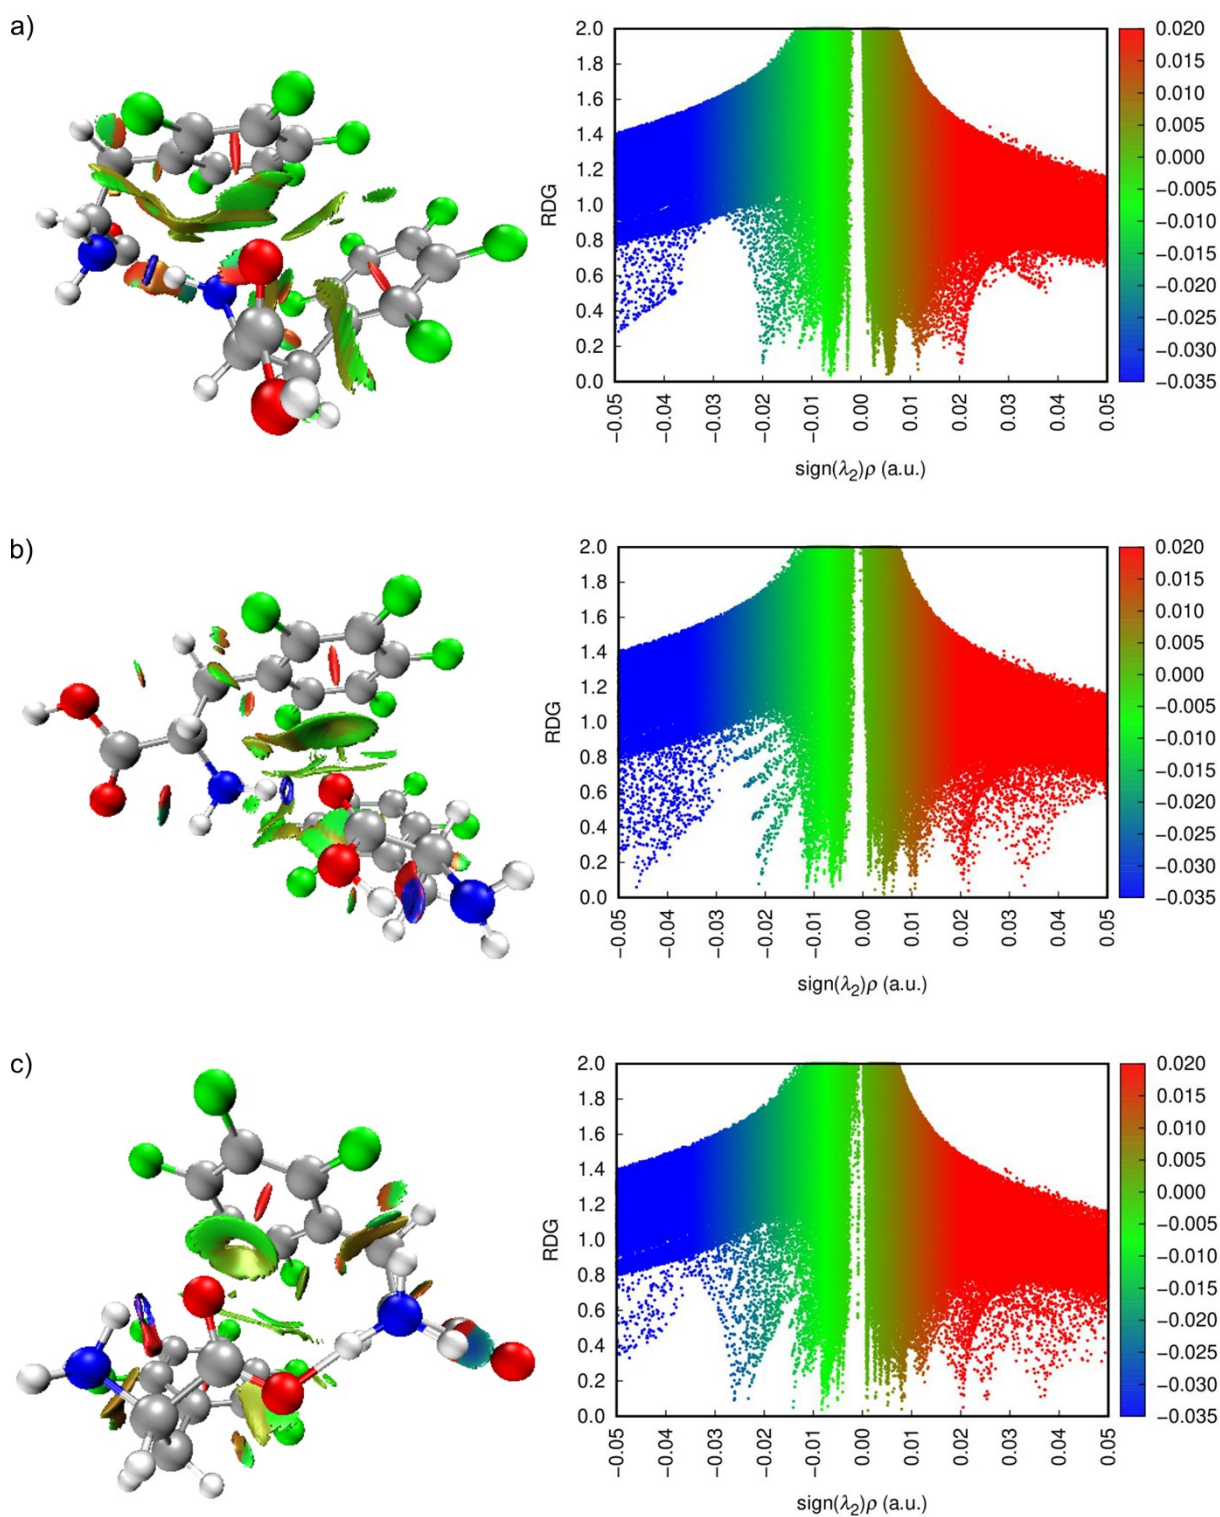

Fig. S8: Non-covalent interaction (NCI) analysis of  $(\text{F}_5\text{-Phe})_2\text{H}^+$  conformers. Reduced density gradient isosurface map (left) and scatter plot (right) for the lowest-energy conformers of a) type A, b) type B, and c) type Z interaction.
